# Supplementary material
Source: PubMed Central journal article supplement (PMC5065102)
Supplement: NIHMS821073-supplement-supplement_1.pdf [file NIHMS821073-supplement-supplement_1.pdf]

**Supplementary Table I (online only).** Standardized difference of means comparison to determine covariate balance in overall propensity score matched groups

| <i>Characteristic</i>               | <i>Propensity score-matched group comparison</i> |                                                         |                               |
|-------------------------------------|--------------------------------------------------|---------------------------------------------------------|-------------------------------|
|                                     | <i>Standardized mean in aspirin group</i>        | <i>Standardized mean in aspirin + clopidogrel group</i> | <i>P value for difference</i> |
| Male gender                         | 1.37                                             | 1.37                                                    | .97                           |
| White race                          | 0.92                                             | 0.92                                                    | .61                           |
| Age category                        | 4.55                                             | 4.56                                                    | .65                           |
| Ipsilateral neurologic symptoms     | 0.29                                             | 0.29                                                    | .63                           |
| History of neck radiation           | 0.01                                             | 0.01                                                    | .86                           |
| Hypertension                        | 0.91                                             | 0.92                                                    | .09                           |
| Coronary artery disease             | 0.36                                             | 0.37                                                    | .47                           |
| Prior CABG or coronary intervention | 0.49                                             | 0.49                                                    | .80                           |
| Congestive heart failure            | 0.11                                             | 0.11                                                    | .40                           |
| Smoking (prior or current)          | 0.77                                             | 0.77                                                    | .81                           |
| COPD                                | 0.22                                             | 0.22                                                    | .80                           |
| Diabetes                            | 0.38                                             | 0.39                                                    | .83                           |
| Creatinine $\geq 1.8\%$             | 0.05                                             | 0.05                                                    | .65                           |
| Pre-op medication regimen           |                                                  |                                                         |                               |
| $\beta$ -blockers                   | 0.67                                             | 0.67                                                    | .81                           |
| Statin use                          | 0.86                                             | 0.86                                                    | .93                           |
| Anticoagulation                     | 0.03                                             | 0.03                                                    | .77                           |
| Stress test result                  | 0.47                                             | 0.46                                                    | .37                           |
| Operative factors                   |                                                  |                                                         |                               |
| Drain                               | 0.46                                             | 0.45                                                    | .21                           |
| Heparin                             | 0.99                                             | 0.99                                                    | 1.00                          |
| Protamine                           | 0.68                                             | 0.68                                                    | .93                           |
| Dextran                             | 0.14                                             | 0.13                                                    | .50                           |
| Conventional vs eversion            | 0.85                                             | 0.86                                                    | .31                           |
| Shunt                               | 0.55                                             | 0.56                                                    | .39                           |
| Patch                               | 0.9                                              | 0.91                                                    | .31                           |
| Post-op hypertension <sup>a</sup>   | 0.17                                             | 0.16                                                    | .19                           |
| Post-op hypotension <sup>a</sup>    | 0.11                                             | 0.11                                                    | .89                           |

CABG, Coronary artery bypass graft; COPD, chronic obstructive pulmonary disease.

<sup>a</sup>Requiring intravenous medication.

**Supplementary Table II (online only).** Standardized difference of means comparison to determine covariate balance in asymptomatic propensity score-matched groups

| Characteristic                      | Asymptomatic propensity score-matched group comparison |                                                  |                        |
|-------------------------------------|--------------------------------------------------------|--------------------------------------------------|------------------------|
|                                     | Standardized mean in aspirin group                     | Standardized mean in aspirin + clopidogrel group | P value for difference |
| Male gender                         | 1.37                                                   | 1.37                                             | .68                    |
| White race                          | 0.92                                                   | 0.93                                             | .56                    |
| Age category                        | 4.6                                                    | 4.6                                              | .17                    |
| Ipsilateral neurologic symptoms     | 0                                                      | 0                                                | —                      |
| History of neck radiation           | 0.01                                                   | 0.01                                             | .83                    |
| Hypertension                        | 0.92                                                   | 0.93                                             | .16                    |
| Coronary artery disease             | 0.40                                                   | 0.41                                             | .25                    |
| Prior CABG or coronary intervention | 0.54                                                   | 0.56                                             | .34                    |
| Congestive heart failure            | 0.12                                                   | 0.11                                             | .94                    |
| Smoking (prior or current)          | 0.77                                                   | 0.76                                             | .37                    |
| COPD                                | 0.22                                                   | 0.21                                             | .52                    |
| Diabetes                            | 0.39                                                   | 0.39                                             | .84                    |
| Creatinine $\geq 1.8\%$             | 0.06                                                   | 0.06                                             | .91                    |
| Pre-op medication regimen           |                                                        |                                                  |                        |
| $\beta$ -blockers                   | 0.69                                                   | 0.70                                             | .41                    |
| Statin use                          | 0.86                                                   | 0.86                                             | 1.0                    |
| Anticoagulation                     | 0.03                                                   | 0.03                                             | .38                    |
| Stress test result                  | 0.51                                                   | 0.51                                             | .88                    |
| Operative factors                   |                                                        |                                                  |                        |
| Drain                               | 0.45                                                   | 0.45                                             | .45                    |
| Heparin                             | 0.99                                                   | 0.98                                             | .34                    |
| Protamine                           | 0.67                                                   | 0.67                                             | .71                    |
| Dextran                             | 0.14                                                   | 0.15                                             | .67                    |
| Conventional vs eversion            | 0.84                                                   | 0.86                                             | .13                    |
| Shunt                               | 0.55                                                   | 0.57                                             | .25                    |
| Patch                               | 0.9                                                    | 0.91                                             | .05                    |
| Post-op hypertension <sup>a</sup>   | 0.17                                                   | 0.16                                             | .39                    |
| Post-op hypotension <sup>a</sup>    | 0.11                                                   | 0.11                                             | .81                    |

CABG, Coronary artery bypass graft; COPD, chronic obstructive pulmonary disease.

<sup>a</sup>Requiring intravenous medication.

**Supplementary Table III (online only).** Major bleeding and thrombotic complications in unmatched and propensity-score matched patients undergoing carotid endarterectomy for asymptomatic carotid disease, stratified by dual antiplatelet use

| Outcomes                     | Asymptomatic                              |                                               |                      |                                         |                                                 |         |
|------------------------------|-------------------------------------------|-----------------------------------------------|----------------------|-----------------------------------------|-------------------------------------------------|---------|
|                              | Unmatched                                 |                                               |                      | Propensity score matched                |                                                 |         |
|                              | Aspirin alone<br>(n = 16,766),<br>No. (%) | Clopidogrel + aspirin,<br>(n = 4834), No. (%) | P value <sup>a</sup> | Aspirin alone<br>(n = 3220),<br>No. (%) | Clopidogrel + aspirin<br>(n = 3220),<br>No. (%) | P value |
| Major bleeding complications |                                           |                                               |                      |                                         |                                                 |         |
| RTOR for bleeding            | 125 (0.8)                                 | 52 (1.1)                                      | .03                  | 31 (1.0)                                | 37 (1.2)                                        | .5      |
| Thrombotic complications     |                                           |                                               |                      |                                         |                                                 |         |
| TIA or stroke                | 194 (1.2)                                 | 39 (0.8)                                      | .04                  | 42 (1.3)                                | 19 (0.6)                                        | .003    |
| Ipsilateral TIA or stroke    | 143 (0.9)                                 | 33 (0.7)                                      | .2                   | 33 (1.0)                                | 17 (0.5)                                        | .02     |
| Any stroke                   | 119 (0.7)                                 | 21 (0.4)                                      | .04                  | 24 (0.8)                                | 11 (0.3)                                        | .03     |
| Post-op MI                   | 123 (0.7)                                 | 57 (1.2)                                      | .003                 | 26 (0.8)                                | 33 (1.0)                                        | .4      |
| Death                        | 26 (0.2)                                  | 11 (0.2)                                      | .3                   | 4 (0.1)                                 | 6 (0.2)                                         | .5      |
| Stroke/death                 | 133 (0.8)                                 | 29 (0.6)                                      | .2                   | 26 (0.8)                                | 16 (0.5)                                        | .1      |

MI, Myocardial infarction; RTOR, return to operating room; TIA, transient ischemic attack.

<sup>a</sup>P values determined using  $\chi^2$  test for categorical variables.

**Supplementary Table IV (online only).** Standardized difference of means comparison to determine covariate balance in symptomatic propensity score-matched groups

| Characteristic                      | Symptomatic propensity score-matched group comparison |                                                  |                        |
|-------------------------------------|-------------------------------------------------------|--------------------------------------------------|------------------------|
|                                     | Standardized mean in aspirin group                    | Standardized mean in aspirin + clopidogrel group | P value for difference |
| Male gender                         | 1.39                                                  | 1.36                                             | .16                    |
| White race                          | 0.92                                                  | 0.92                                             | .64                    |
| Age category                        | 4.5                                                   | 4.6                                              | .54                    |
| Ipsilateral neurologic symptoms     | 1                                                     | 1                                                | —                      |
| History of neck radiation           | 0.01                                                  | 0.01                                             | .86                    |
| Hypertension                        | 0.88                                                  | 0.87                                             | .48                    |
| Coronary artery disease             | 0.27                                                  | 0.28                                             | .74                    |
| Prior CABG or coronary intervention | 0.34                                                  | 0.34                                             | .86                    |
| Congestive heart failure            | 0.09                                                  | 0.09                                             | .66                    |
| Smoking (prior or current)          | 0.76                                                  | 0.74                                             | .13                    |
| COPD                                | 0.22                                                  | 0.23                                             | .96                    |
| Diabetes                            | 0.34                                                  | 0.33                                             | .73                    |
| Creatinine $\geq$ 1.8%              | 0.05                                                  | 0.05                                             | .98                    |
| Pre-op medication regimen           |                                                       |                                                  |                        |
| $\beta$ -blockers                   | 0.59                                                  | 0.60                                             | .60                    |
| Statin use                          | 0.86                                                  | 0.86                                             | .75                    |
| Anticoagulation                     | 0.04                                                  | 0.04                                             | .74                    |
| Stress test result                  | 0.35                                                  | 0.35                                             | .90                    |
| Operative factors                   |                                                       |                                                  |                        |
| Drain                               | 0.46                                                  | 0.47                                             | .44                    |
| Heparin                             | 0.99                                                  | 0.99                                             | .69                    |
| Protamine                           | 0.70                                                  | 0.71                                             | .59                    |
| Dextran                             | 0.12                                                  | 0.12                                             | .65                    |
| Conventional (vs eversion)          | 0.87                                                  | 0.87                                             | .89                    |
| Shunt                               | 0.57                                                  | 0.56                                             | .66                    |
| Patch                               | 0.90                                                  | 0.91                                             | .87                    |
| Post-op hypertension <sup>a</sup>   | 0.18                                                  | 0.17                                             | .79                    |
| Post-op hypotension <sup>a</sup>    | 0.11                                                  | 0.11                                             | .77                    |

CABG, Coronary artery bypass graft; COPD, chronic obstructive pulmonary disease.

<sup>a</sup>Requiring intravenous medication.**Supplementary Table V (online only).** Major bleeding and thrombotic complications in unmatched and propensity-score matched patients undergoing carotid endarterectomy for symptomatic carotid disease, stratified by dual antiplatelet use

| Outcomes                     | Symptomatic                          |                                              |                      |                                      |                                              |         |
|------------------------------|--------------------------------------|----------------------------------------------|----------------------|--------------------------------------|----------------------------------------------|---------|
|                              | Unmatched                            |                                              |                      | Propensity score matched             |                                              |         |
|                              | Aspirin alone<br>(n = 4792), No. (%) | Clopidogrel + aspirin<br>(n = 2193), No. (%) | P value <sup>a</sup> | Aspirin alone<br>(n = 1306), No. (%) | Clopidogrel + aspirin<br>(n = 1306), No. (%) | P value |
| Major bleeding complications |                                      |                                              |                      |                                      |                                              |         |
| RTOR for bleeding            | 33 (0.7)                             | 32 (1.5)                                     | .002                 | 8 (0.6)                              | 20 (1.5)                                     | .02     |
| Thrombotic complications     |                                      |                                              |                      |                                      |                                              |         |
| TIA or stroke                | 85 (1.8)                             | 32 (1.5)                                     | .3                   | 18 (1.4)                             | 21 (1.6)                                     | .6      |
| Ipsilateral TIA or stroke    | 65 (1.4)                             | 25 (1.1)                                     | .5                   | 13 (1.0)                             | 17 (1.3)                                     | .5      |
| Any stroke                   | 61 (1.3)                             | 25 (1.1)                                     | .6                   | 14 (1.1)                             | 16 (1.2)                                     | .7      |
| Post-op MI                   | 41 (0.9)                             | 26 (1.2)                                     | .2                   | 12 (0.9)                             | 10 (0.8)                                     | .7      |
| Death                        | 18 (0.4)                             | 7 (0.3)                                      | .7                   | 7 (0.5)                              | 3 (0.2)                                      | .2      |
| Stroke/death                 | 73 (1.5)                             | 27 (1.2)                                     | .3                   | 19 (1.5)                             | 17 (1.3)                                     | .7      |

MI, Myocardial infarction; RTOR, return to operating room; TIA, transient ischemic attack.

<sup>a</sup>P values determined using  $\chi^2$  test for categorical variables.
